# Supplementary material for: The Epigenetic Regulatory Protein CBX2 Promotes mTORC1 Signalling and Inhibits DREAM Complex Activity to Drive Breast Cancer Cell Growth
Source: MDPI journal article supplement (doi:10.3390/cancers14143491), 2022-07-18
Supplement: s1 [file s1]

**Supplementary Table S1 – siRNA sequences**

| siRNA Name | Sequence (5' - 3')  |
|------------|---------------------|
| siSCR      | UUCUCCGAACGUGUCACGU |
| siCBX2#1   | AGGAGGUGCAGAACCGGAA |
| siCBX2#2   | GCAAGGGCAAGCUGGAGUA |
| siCBX2#3   | CAAGGAAGCUCACUGCCAU |

**Supplementary Table S2 – Antibody details and uses**

|                                              | Use              |              |
|----------------------------------------------|------------------|--------------|
| Antibody                                     | Western Analysis | ChIP/CUT&RUN |
| CBX2 - ab80044 - Abcam                       | X                |              |
| CBX2 - C15410339 - Diagenode                 |                  | X            |
| $\alpha$ -tubulin - 66031-1-Ig - Proteintech | X                |              |
| RBL2 - 13610S - CST                          | X                | X            |
| Rabbit IgG - C15410206 - Diagenode           |                  | X            |
| Secondary Antibodies                         |                  |              |
| Polyclonal Swine Anti-Rabbit HRP - DAKO      | X                |              |
| Polyclonal Rabbit Anti-Mouse HRP - DAKO      | X                |              |

**Supplementary Table S3 – Gene expression and ChIP/CUT&RUN qPCR primers**

| mRNA Primers | Sequence 5'-3'             |
|--------------|----------------------------|
| RPL13A F     | CCTGGAGGAGAAGAGGAAAGAGA    |
| RPL13A R     | TTGAGGACCTCTGTGTATTTGTCAA  |
|              |                            |
| CBX2 F       | GCTCCAAAGCCAGACTAACA       |
| CBX2 R       | CAGGGACAGACATCCTCATTTTC    |
|              |                            |
| AURKA F      | CCTACAAAAGAATATCACGGG      |
| AURKA R      | CAAGTACTTCTCTGAGCATTG      |
|              |                            |
| PLK1 F       | ATTTCCGCAATTACATGAGC       |
| PLK1 R       | TCCTGGAAGAAGTTGATCTG       |
|              |                            |
| CCNA2 F      | AGCTGCCTTTCATTTAGCACTCTAC  |
| CCNA2 R      | TTAAGACTTTCAGGGTATATCCAGTC |

  

| ChIP/CUT&RUN Primers | Sequence 5'-3'         |
|----------------------|------------------------|
| TSC1 F               | GCCGTCTATCCTTCCTTTCTGA |
| TSC1 2               | CGCCAGGAAAAAGAGTCCC    |
|                      |                        |
| PRKAA2 F             | TTCCCTTTTACAGCCCCTCG   |
| PRKAA2 R             | TGGAAGAAGAGACGGGCCT    |
|                      |                        |
| RBL2 F               | CATGATTTTTGGCCCCCTTGA  |
| RBL2 R               | CAGGCACCCGTAGTCTTGA    |
|                      |                        |
| CCNA2 F              | AGTTCAAGTATCCCGCGACT   |
| CCNA2 R              | GGTTTACCCTTCACTCGCCT   |
|                      |                        |
| UBE2C F              | GGACCGTTTGAATGAGACGC   |
| UBE2C R              | CCCAGGAAGACCGTTAGTCG   |
|                      |                        |
| CCNB1 F              | CTGGAAACGCATTCTCTGCG   |
| CCNB1 R              | GCCAGCCTAGCCTCAGATTT   |

**Supplementary Table S4** – Significantly enriched gene sets for genes downregulated following CBX2 depletion using siCBX2#2 in MDA-MB-231 cells. Enriched gene sets from the Hallmark and Oncogenic Signature curated datasets are shown. Gene sets are inversely ranked by Normalised Enrichment Score (NES). SIZE = number of differentially expressed genes enriched in the gene set. NOM = nominal p-value, FDR = False Discover Rate q-value.

| <i>Hallmark Gene Set</i>            |             |            |                  |                  |
|-------------------------------------|-------------|------------|------------------|------------------|
| <u>NAME</u>                         | <u>SIZE</u> | <u>NES</u> | <u>NOM p-val</u> | <u>FDR q-val</u> |
| HALLMARK_INTERFERON_GAMMA_RESPONSE  | 46          | -4.067     | <0.001           | <0.001           |
| HALLMARK_TNFA_SIGNALING_VIA_NFKB    | 60          | -3.603     | <0.001           | <0.001           |
| HALLMARK_INFLAMMATORY_RESPONSE      | 43          | -3.260     | <0.001           | <0.001           |
| HALLMARK_INTERFERON_ALPHA_RESPONSE  | 29          | -2.982     | <0.001           | <0.001           |
| HALLMARK_IL6_JAK_STAT3_SIGNALING    | 25          | -2.853     | <0.001           | <0.001           |
| HALLMARK_G2M_CHECKPOINT             | 40          | -2.618     | <0.001           | <0.001           |
| HALLMARK_MTORC1_SIGNALING           | 46          | -2.435     | <0.001           | 0.001            |
| HALLMARK_KRAS_SIGNALING_UP          | 48          | -2.392     | 0.002            | 0.002            |
| HALLMARK_ALLOGRAFT_REJECTION        | 39          | -2.339     | 0.004            | 0.002            |
| HALLMARK_UV_RESPONSE_UP             | 40          | -2.259     | 0.000            | 0.003            |
| HALLMARK_MYC_TARGETS_V1             | 33          | -2.223     | 0.002            | 0.004            |
| HALLMARK_ANDROGEN_RESPONSE          | 26          | -2.085     | 0.002            | 0.009            |
| HALLMARK_ESTROGEN_RESPONSE_LATE     | 55          | -1.953     | 0.010            | 0.018            |
| HALLMARK_CHOLESTEROL_HOMEOSTASIS    | 20          | -1.898     | 0.010            | 0.023            |
| HALLMARK_XENOBIOTIC_METABOLISM      | 46          | -1.896     | 0.004            | 0.022            |
| HALLMARK_E2F_TARGETS                | 37          | -1.767     | 0.014            | 0.041            |
| <i>Oncogenic signature gene set</i> |             |            |                  |                  |
| <u>NAME</u>                         | <u>SIZE</u> | <u>NES</u> | <u>NOM p-val</u> | <u>FDR q-val</u> |
| KRAS.BREAST_UP.V1_UP                | 18          | -3.478     | <0.001           | <0.001           |
| RPS14_DN.V1_UP                      | 56          | -3.447     | <0.001           | <0.001           |
| KRAS.600.LUNG.BREAST_UP.V1_UP       | 53          | -3.299     | <0.001           | <0.001           |
| KRAS.LUNG.BREAST_UP.V1_UP           | 26          | -3.152     | <0.001           | <0.001           |
| BMI1_DN.V1_UP                       | 42          | -2.479     | <0.001           | 0.005            |
| MEL18_DN.V1_DN                      | 33          | -2.311     | 0.002            | 0.014            |
| LEF1_UP.V1_DN                       | 52          | -2.301     | <0.001           | 0.014            |
| MTOR_UP.V1_UP                       | 40          | -2.282     | <0.001           | 0.014            |
| PRC2_EED_UP.V1_DN                   | 46          | -2.194     | <0.001           | 0.022            |
| JNK_DN.V1_UP                        | 42          | -2.186     | 0.002            | 0.021            |

**Supplementary Table S5** – Significantly enriched gene sets for genes downregulated following CBX2 depletion using siCBX2#3 in MCF-7 cells. The 10 most significantly enriched gene sets from the Hallmark and Oncogenic Signature curated datasets shown. Gene sets inversely ranked by Normalised Enrichment Score (NES). NOM = nominal p-value, FDR = False Discover Rate q-value.

| <i>Hallmark Gene Set</i>            |             |            |                  |                  |
|-------------------------------------|-------------|------------|------------------|------------------|
| <u>NAME</u>                         | <u>SIZE</u> | <u>NES</u> | <u>NOM p-val</u> | <u>FDR q-val</u> |
| HALLMARK_E2F_TARGETS                | 121         | -7.096     | <0.001           | <0.001           |
| HALLMARK_G2M_CHECKPOINT             | 112         | -6.241     | <0.001           | <0.001           |
| HALLMARK_MYC_TARGETS_V1             | 75          | -5.580     | <0.001           | <0.001           |
| HALLMARK_ESTROGEN_RESPONSE_LATE     | 94          | -4.446     | <0.001           | <0.001           |
| HALLMARK_ESTROGEN_RESPONSE_EARLY    | 90          | -4.059     | <0.001           | <0.001           |
| HALLMARK_MYC_TARGETS_V2             | 33          | -3.763     | <0.001           | <0.001           |
| HALLMARK_MTORC1_SIGNALING           | 61          | -3.199     | <0.001           | <0.001           |
| HALLMARK_KRAS_SIGNALING_UP          | 56          | -2.839     | <0.001           | <0.001           |
| HALLMARK_MITOTIC_SPINDLE            | 92          | -2.477     | <0.001           | 0.002            |
| HALLMARK_OXIDATIVE_PHOSPHORYLATION  | 55          | -2.451     | <0.001           | 0.002            |
| <i>Oncogenic signature gene set</i> |             |            |                  |                  |
| <u>NAME</u>                         | <u>SIZE</u> | <u>NES</u> | <u>NOM p-val</u> | <u>FDR q-val</u> |
| CSR_LATE_UP.V1_UP                   | 75          | -4.743     | <0.001           | <0.001           |
| RPS14_DN.V1_DN                      | 84          | -4.577     | <0.001           | <0.001           |
| MYC_UP.V1_UP                        | 70          | -3.761     | <0.001           | <0.001           |
| VEGF_A_UP.V1_DN                     | 85          | -3.551     | <0.001           | <0.001           |
| RB_P107_DN.V1_UP                    | 65          | -3.484     | <0.001           | <0.001           |
| PRC2_EZH2_UP.V1_DN                  | 76          | -3.468     | <0.001           | <0.001           |
| HOXA9_DN.V1_DN                      | 64          | -3.289     | <0.001           | <0.001           |
| MEK_UP.V1_UP                        | 81          | -3.282     | <0.001           | <0.001           |
| GCNP_SHH_UP_LATE.V1_UP              | 64          | -3.170     | <0.001           | <0.001           |
| E2F1_UP.V1_UP                       | 78          | -3.161     | <0.001           | <0.001           |

A

MDA-MB-231

| Cell Cycle Phase | siCR            |     | siCBX2#1        |     | siCBX2#2        |     | siCBX2#3        |     |
|------------------|-----------------|-----|-----------------|-----|-----------------|-----|-----------------|-----|
|                  | Mean % of cells | SD  |
| Sub-G1           | 10.7            | 2.8 | 10.8            | 0.9 | 17.4            | 0.7 | 22.4            | 4.3 |
| G1               | 58.3            | 1.0 | 51.9            | 0.9 | 31.6            | 1.6 | 38.1            | 2.1 |
| S                | 19.8            | 0.8 | 19.2            | 0.4 | 37.7            | 1.4 | 13.4            | 0.4 |
| G2M              | 11.7            | 1.1 | 18.5            | 0.3 | 13.9            | 1.0 | 26.5            | 1.9 |

MDA-MB-468

| Cell Cycle Phase | siCR            |     | siCBX2#1        |     | siCBX2#2        |     | siCBX2#3        |      |
|------------------|-----------------|-----|-----------------|-----|-----------------|-----|-----------------|------|
|                  | Mean % of cells | SD   |
| Sub-G1           | 5.7             | 2.8 | 5.5             | 2.7 | 8.7             | 2.9 | 16.5            | 6.7  |
| G1               | 60.0            | 3.2 | 63.9            | 0.5 | 58.9            | 5.7 | 41.2            | 21.2 |
| S                | 14.2            | 1.9 | 12.4            | 1.5 | 13.3            | 2.2 | 13.8            | 1.8  |
| G2M              | 18.8            | 2.6 | 17.0            | 3.6 | 19.4            | 9.2 | 26.3            | 14.9 |

B

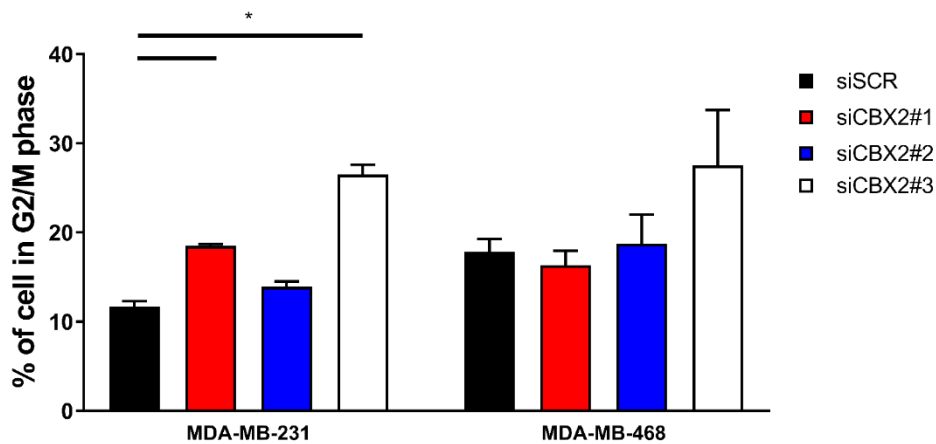

**Supplementary Figure S1 – Percentage of cells in G2/M phase of the cell cycle following propidium iodide flow cytometry analysis of MDA-MB-231 and MDA-MB-468 cells.** MDA-MB-231 and MDA-MB-468 cells were harvested and stained with propidium iodide 72 hours post transfection for flow cytometry analysis. (A) Table of flow cytometry data showing percentage of cells in each phase of the cell cycle. (B) Percentage of cells in G2/M phase of the cell cycle. Data are an average of 3 repeats  $\pm$  SEM and comparisons of the percentage of cells in each cell cycle phase were made between each transfection condition. *P*-values were determined by Turkey’s multiple comparisons test (\*denotes *P* < 0.05).

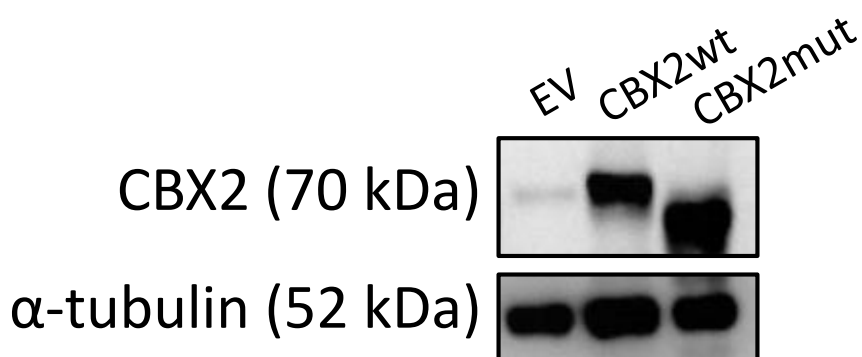

**Supplementary Figure S2 – Ectopic CBX2 protein expression.** MDA-MB-231 cells were transfected with 1  $\mu$ g of either an empty vector control plasmid (EV), a plasmid containing a wild-type version of CBX2 (CBX2wt) or a chromodomain deficient mutant (CBX2mut) and grown for 72 hours followed by western blot analysis using antibodies specific to CBX2 and  $\alpha$ -tubulin.  $\alpha$ -tubulin was used to compare protein loading between samples. The band height for CBX2mut is lower than the wild type version of CBX2 due to an N-terminal deletion of the chromodomain of CBX2.

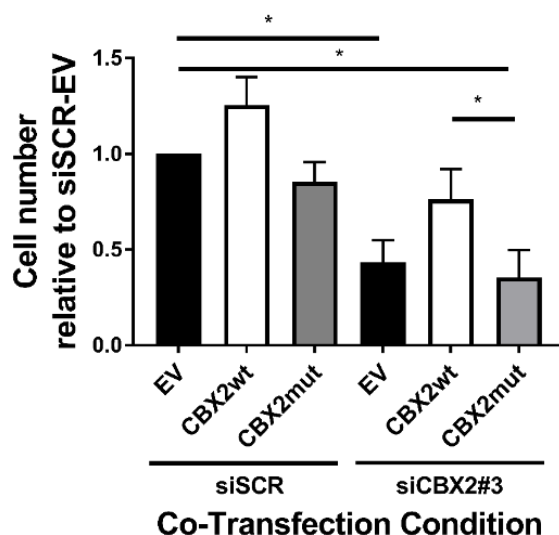

**Supplementary Figure S3 – MDA-MB-468 cell growth rescue experiment.** MDA-MB-468 cells were co-transfected with combinations of siSCR, siCBX2#3 and empty vector (EV) or CBX2wt/mut plasmids and grown for 72 hours followed by cell counts. Data are the average of three independent experiments  $\pm$  SEM and is expressed relative to cell counts for siSCR and empty vector co-transfected cells. *P*-values were determined by Turkey's multiple comparisons test (\*denotes  $P < 0.05$ ).

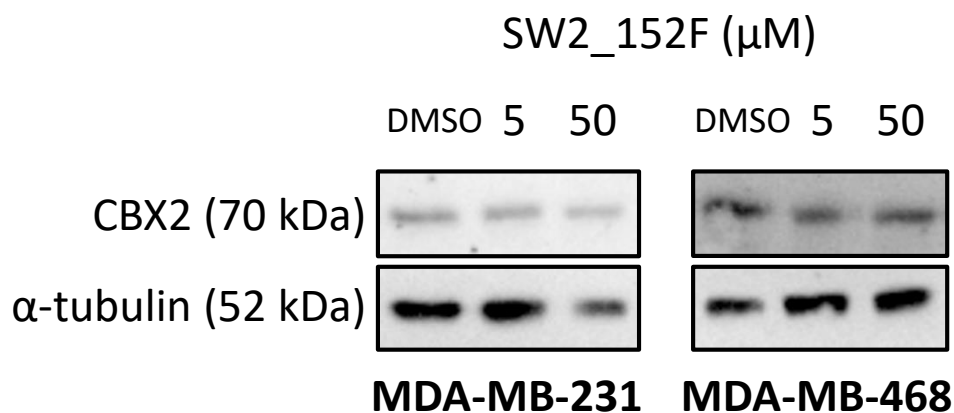

**Supplementary Figure S4 – CBX2 protein expression following SW2\_152F treatment.** MDA-MB-231 and MDA-MB-468 cells were treated with a DMSO control or 5 and 50  $\mu$ M of SW2\_152F and grown for 72 hours (MDA-MB-231) or 96 hours (MDA-MB-468) followed by western blot analysis using antibodies specific to CBX2 and  $\alpha$ -tubulin.  $\alpha$ -tubulin was used to compare protein loading between samples.

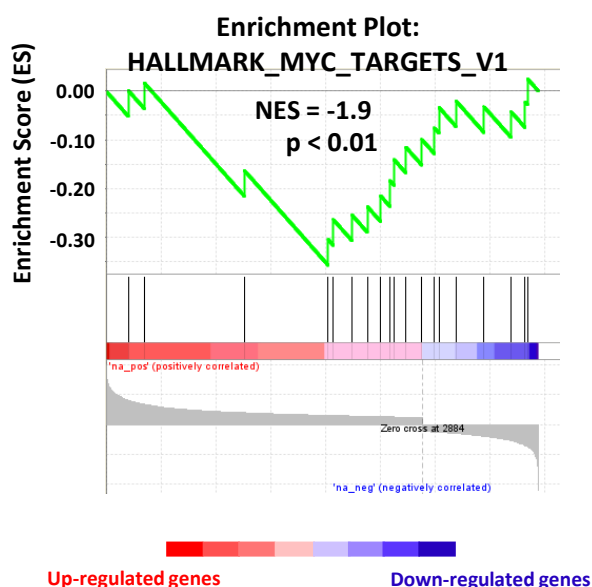

**Supplementary Figure S5 - GSEA analysis of CBX2-depleted MDA-MB-231 cells – MYC Targets.** MDA-MB-231 cells were transfected with either a non-silencing control siRNA (siSCR) or siCBX2#3 and grown for 72 hours. RNA was extracted and RNA-sequencing analysis was performed. GSEA of the CBX2-regulated transcriptome (defined as genes significantly ( $p_{adj} < 0.05$ ) up ( $n=2884$ ) or down ( $n=1060$ ) regulated 1.5 fold after knockdown compared to siSCR controls) against the “Hallmark” curated dataset identified significant negative enrichment of genes associated with the HALLMARK\_MYC\_TARGETS\_V1 gene set. NES = Normalised Enrichment Score. p= nominal p-value.

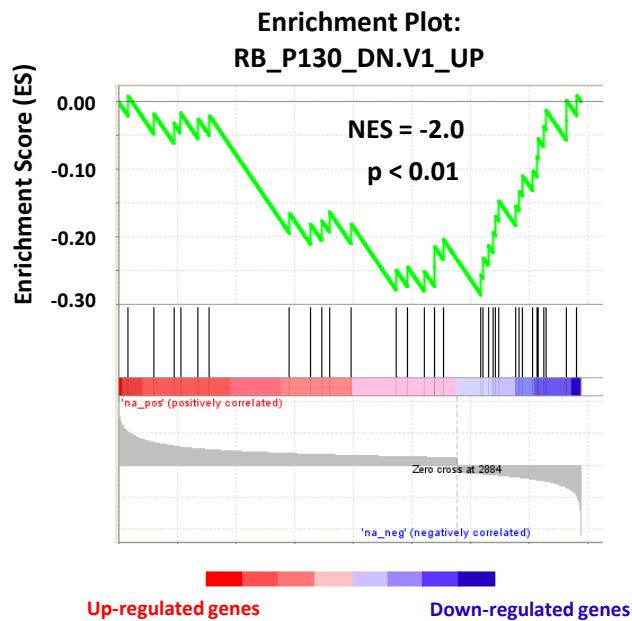

**Supplementary Figure S6 - GSEA analysis of CBX2-depleted MDA-MB-231 cells – RBL2 targets.** MDA-MB-231 cells were transfected with either a non-silencing control siRNA (siSCR) or siCBX2#3 and grown for 72 hours. RNA was extracted and RNA-sequencing analysis was performed. GSEA of the CBX2-regulated transcriptome (defined as genes significantly ( $p_{adj} < 0.05$ ) up ( $n=2884$ ) or down ( $n=1060$ ) regulated 1.5 fold after knockdown compared to siSCR controls) against the “Hallmark” curated dataset identified significant negative enrichment of genes associated with the RB\_P130\_DN.V1\_UP gene set. This gene set represents genes upregulated when RBL2 expression is low. NES = Normalised Enrichment Score.  $p$  = nominal  $p$ -value.

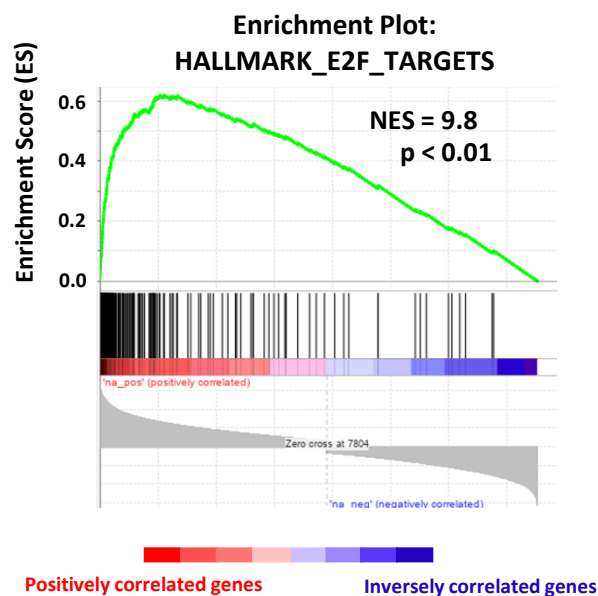

**Supplementary Figure S7 - GSEA of genes significantly positively correlated (Spearman's  $p < 0.05$ ) with CBX2 expression from TCGA PanCancer Database for Breast Cancer.** NES = Normalised Enrichment Score.  $p$  = nominal  $p$ -value.



## MCF-7

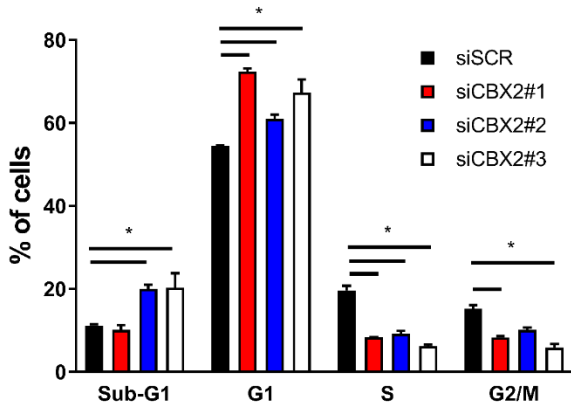

## T47D

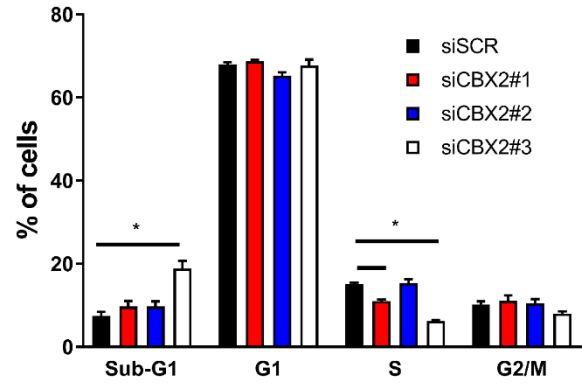

### MCF-7

| Cell Cycle Phase | siSCR           |     | siCBX2#1        |     | siCBX2#2        |     | siCBX2#3        |     |
|------------------|-----------------|-----|-----------------|-----|-----------------|-----|-----------------|-----|
|                  | Mean % of cells | SD  |
| Sub-G1           | 11.2            | 0.5 | 10.1            | 2.0 | 20.0            | 1.7 | 20.3            | 6.0 |
| G1               | 54.5            | 0.2 | 72.4            | 1.3 | 61.0            | 1.8 | 67.3            | 5.5 |
| S                | 19.7            | 1.9 | 8.4             | 0.1 | 9.2             | 1.2 | 6.2             | 0.7 |
| G2M              | 15.2            | 1.6 | 8.4             | 0.5 | 10.1            | 1.0 | 5.9             | 1.4 |

### T47D

| Cell Cycle Phase | siSCR           |     | siCBX2#1        |     | siCBX2#2        |     | siCBX2#3        |     |
|------------------|-----------------|-----|-----------------|-----|-----------------|-----|-----------------|-----|
|                  | Mean % of cells | SD  |
| Sub-G1           | 7.4             | 1.8 | 9.8             | 2.3 | 9.8             | 2.1 | 18.9            | 3.1 |
| G1               | 68.0            | 0.9 | 68.7            | 0.5 | 65.2            | 1.4 | 67.7            | 2.6 |
| S                | 15.0            | 0.7 | 11.0            | 0.6 | 15.3            | 1.6 | 6.2             | 0.4 |
| G2M              | 10.2            | 1.4 | 11.1            | 2.2 | 10.5            | 1.8 | 8.1             | 0.9 |

**Supplementary Figure S8 – Propidium iodide flow cytometry analysis of MCF-7 and T47D cells.** MCF-7 and T47D cells were harvested and stained with propidium iodide 72 hours post transfection for flow cytometry analysis. Data are an average of 3 repeats  $\pm$  SEM and comparisons of the percentage of cells in each cell cycle phase were made between each transfection condition. *P*-values were determined by Turkey's multiple comparisons test (\*denotes  $P < 0.05$ ).

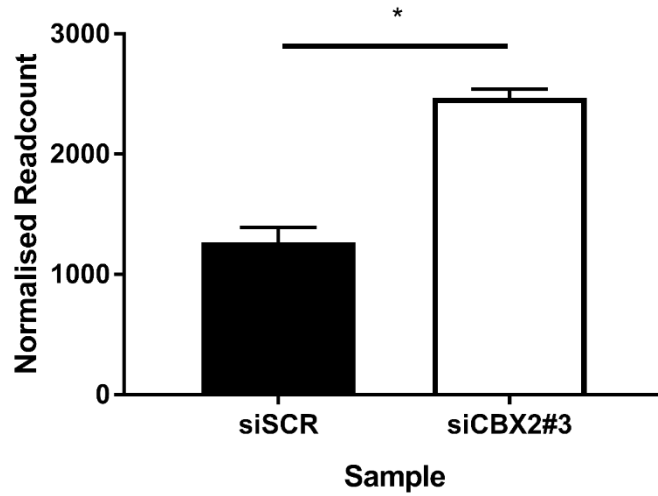

**Supplementary Figure S9 – TSC1 expression in CBX2 depleted MCF-7 cells.** MCF-7 cells were transfected with either a non-silencing control siRNA (siSCR) or siCBX2#3 and grown for 72 hours. RNA was extracted and RNA-sequencing analysis was performed. *TSC1* gene expression shown as mean normalised read count. Data is an average of 3 independent experiments  $\pm$  SEM (\*  $p_{adj} < 0.05$ ).

**Western Blot Images**  
**Uncropped blots and densitometry intensity ratios**

Figure 1a – Red box indicates part of image in figure. Intensity ratios relative to siSCR transfected cells (normalised to 100%) are shown below each band. Sample is indicated above each band. IB = immunoblot of designated protein.

**MDA-MB-231**

**IB: CBX2**

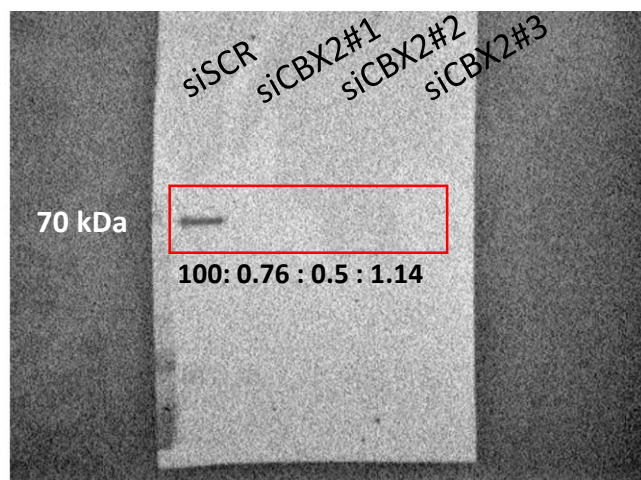

**IB: α-tubulin**

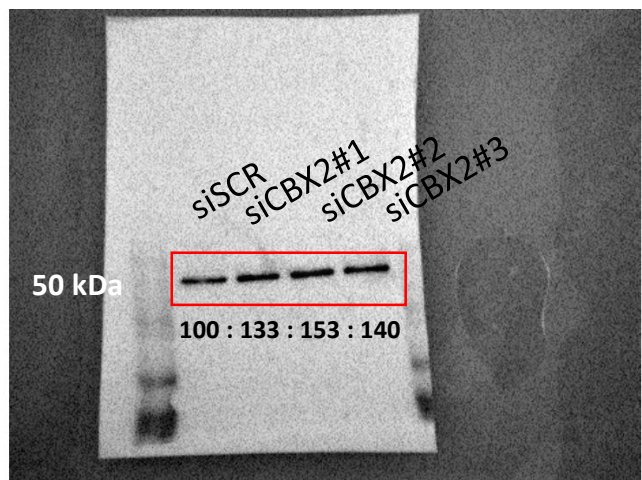

**MDA-MB-468**

**IB: CBX2**

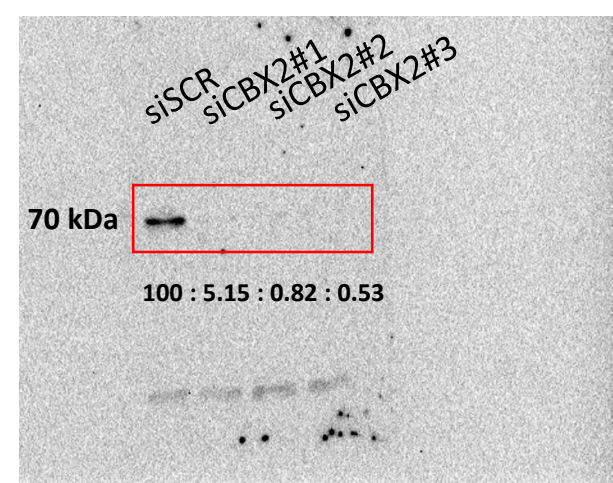

**IB: α-tubulin**

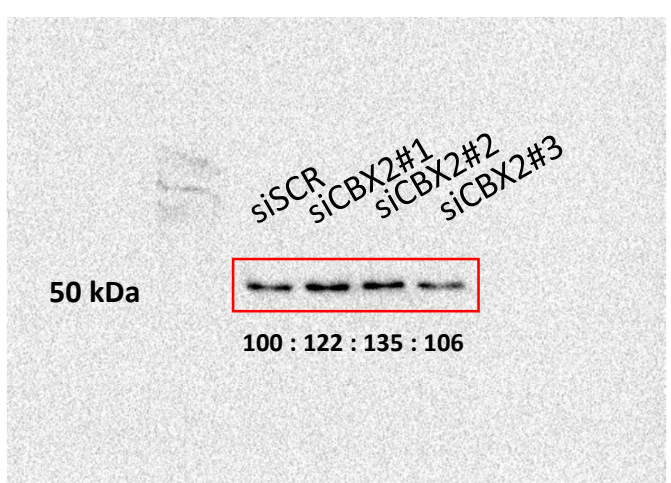

**Hs-578T**

**IB: CBX2**

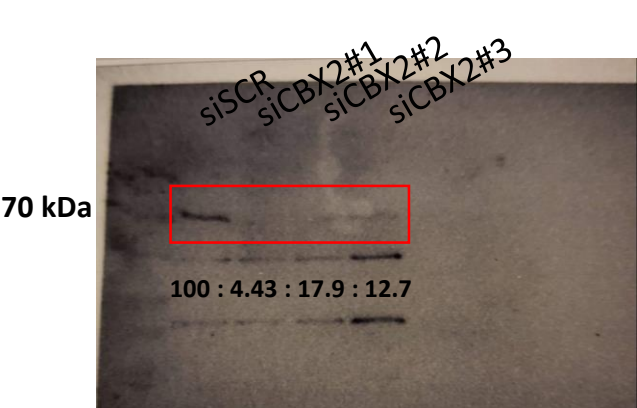

**IB: α-tubulin**

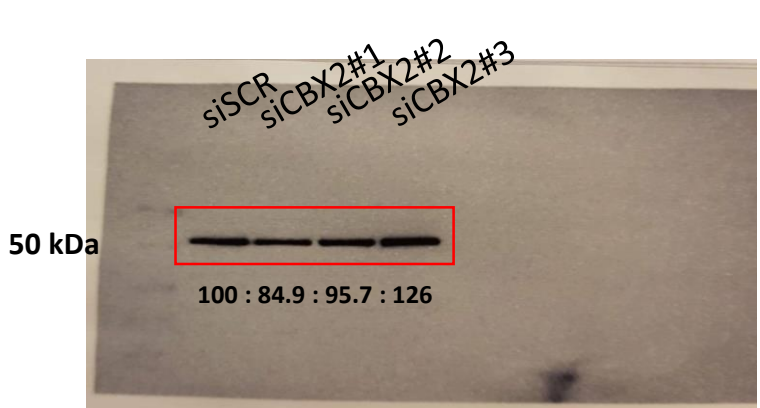

Figure 2c - Red box indicates part of image in figure. Intensity ratios relative to siSCR transfected cells (normalised to 100%) are shown below the red box or blot. Sample is indicated above each band. IB = immunoblot of designated protein.

**MDA-MB-231**

**IB: RBL2**

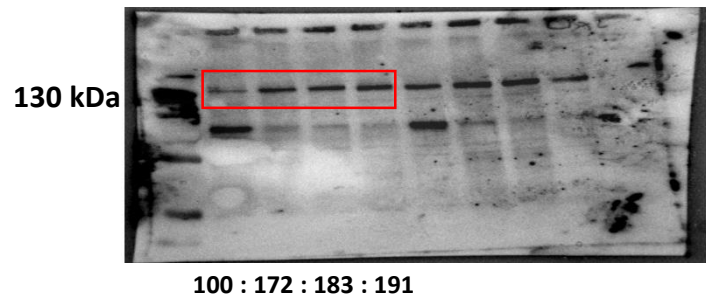

**IB: CBX2**

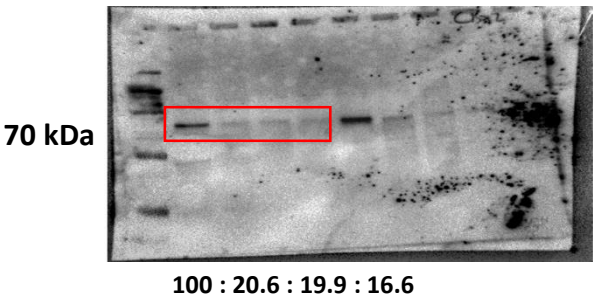

**IB:  $\alpha$ -tubulin**

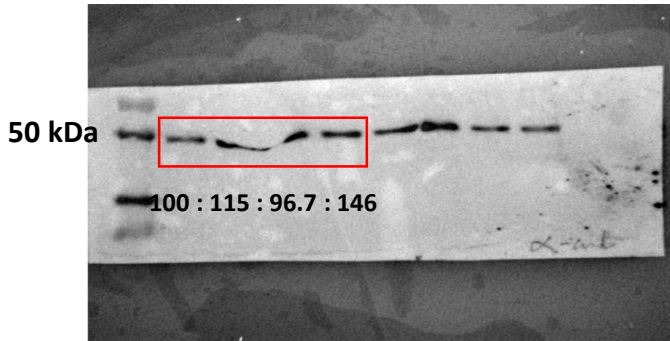

Lane order left to right of samples shown in figure (red box):

- 1. siSCR
- 2. siCBX2#1
- 3. siCBX2#2
- 4. siCBX2#3

**MDA-MB-468**

**IB: RBL2**

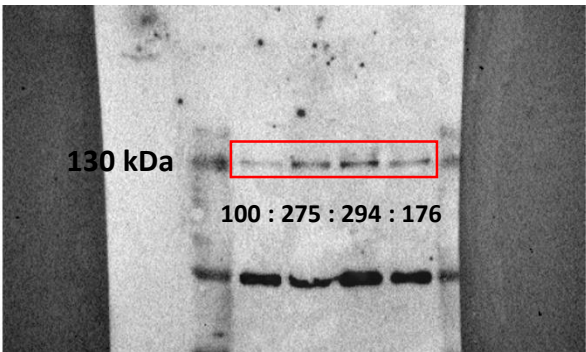

**IB: CBX2**

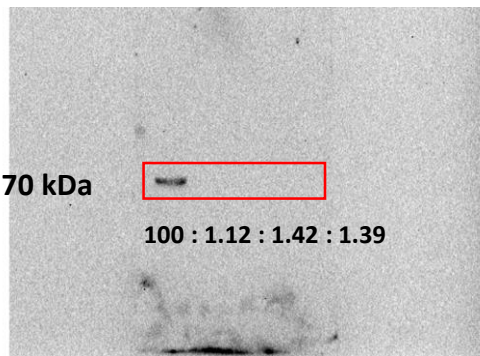

**IB:  $\alpha$ -tubulin**

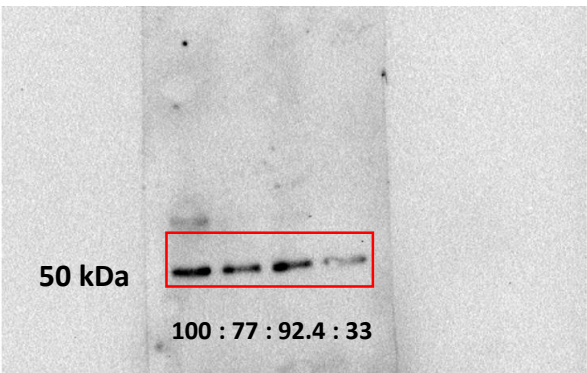

Lane order left to right of samples shown in figure (red box):

- 1. siSCR
- 2. siCBX2#1
- 3. siCBX2#2
- 4. siCBX2#3



Figure 4a - Red box indicates part of image in figure. Intensity ratios relative to siSCR transfected cells (normalised to 100%) are shown below the red box or blot. Sample is indicated above each band. IB = immunoblot of designated protein.

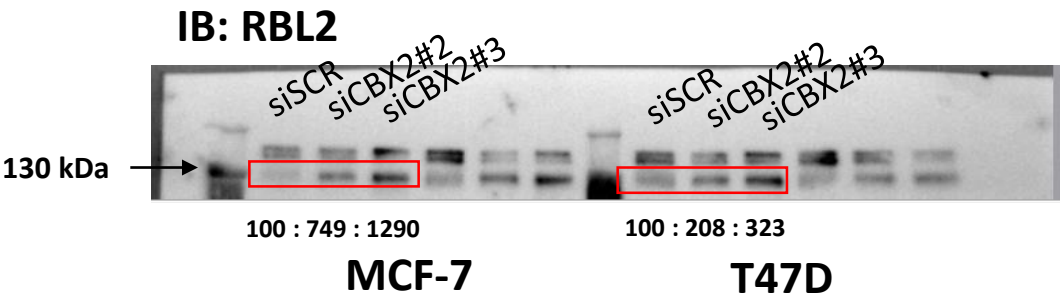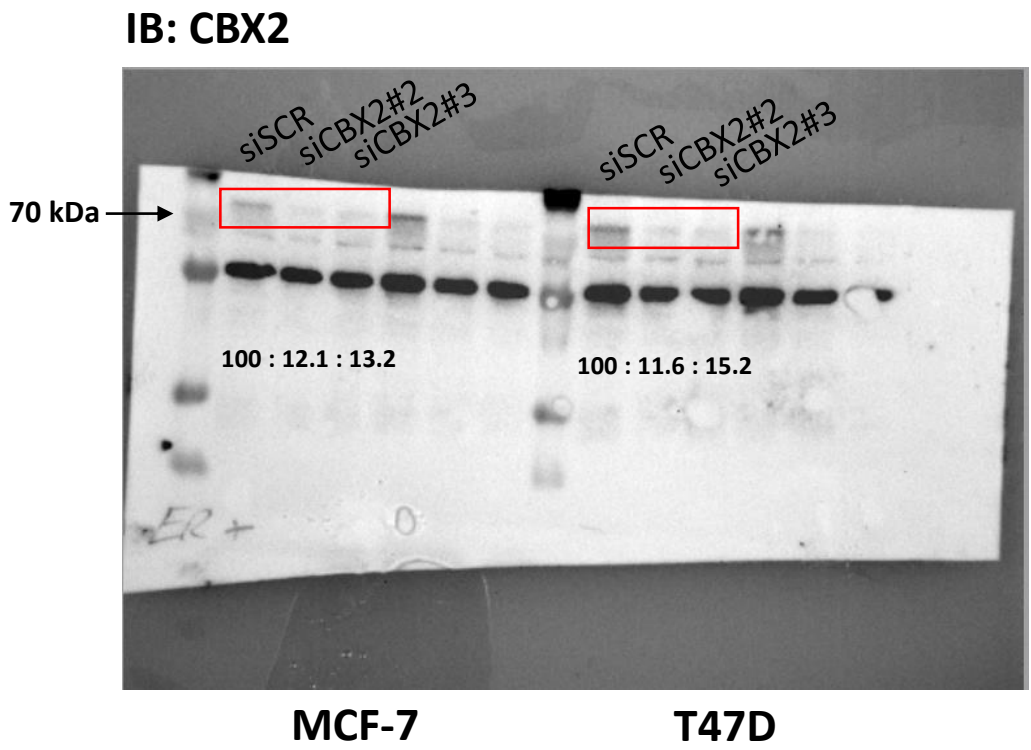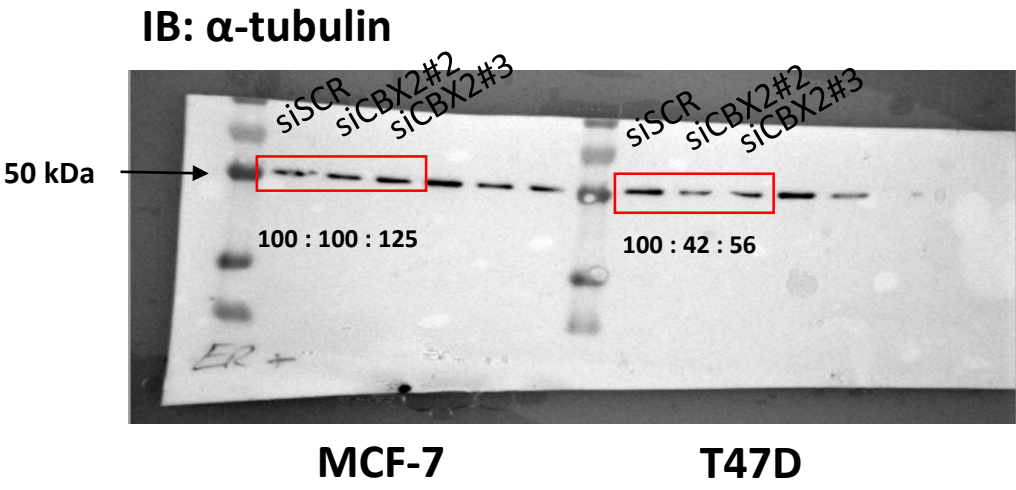

Supplementary Figure S2 - Red box indicates part of image in figure. Intensity ratios relative to empty vector (EV) transfected cells (normalised to 100%) are shown below the red box or blot. Sample is indicated above each band. IB = immunoblot of designated protein.

**IB: CBX2**

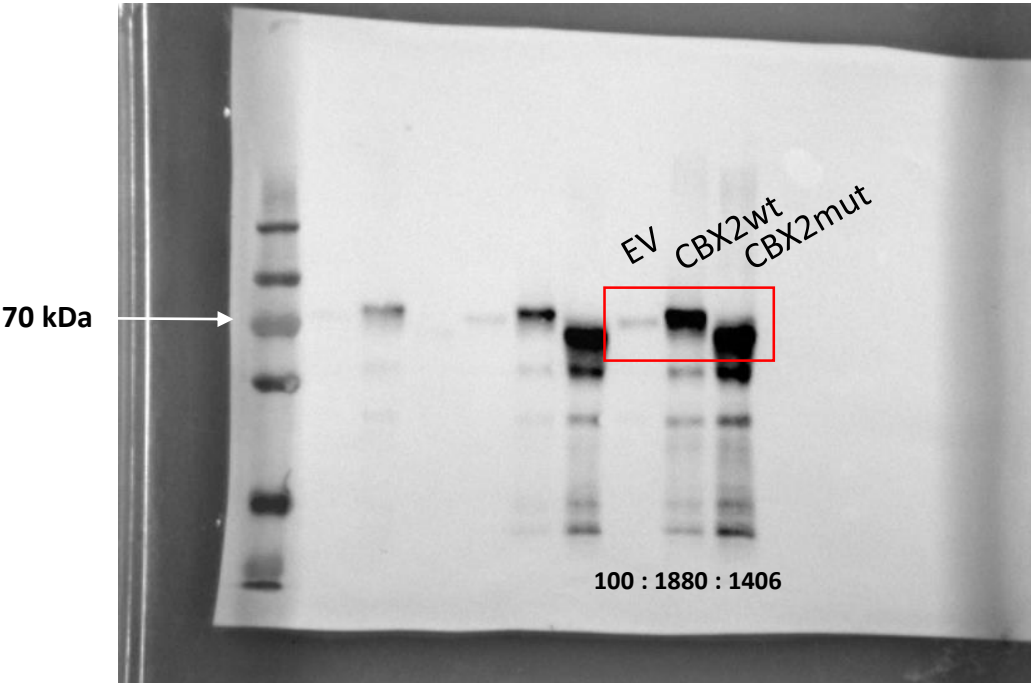

**IB:  $\alpha$ -tubulin**

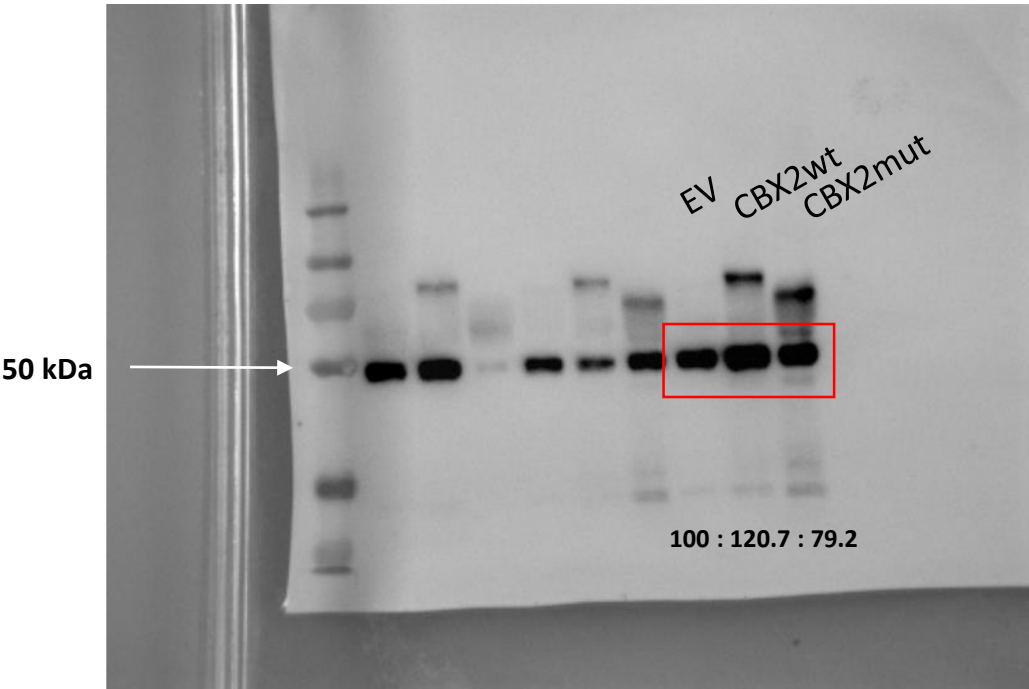

Supplementary Figure S4 - Red box indicates part of image in figure. Intensity ratios relative to DMSO treated cells (normalised to 100%) are shown below the red box or blot. Sample is indicated above each band. IB = immunoblot of designated protein.

**MDA-MB-231**

**IB: CBX2**

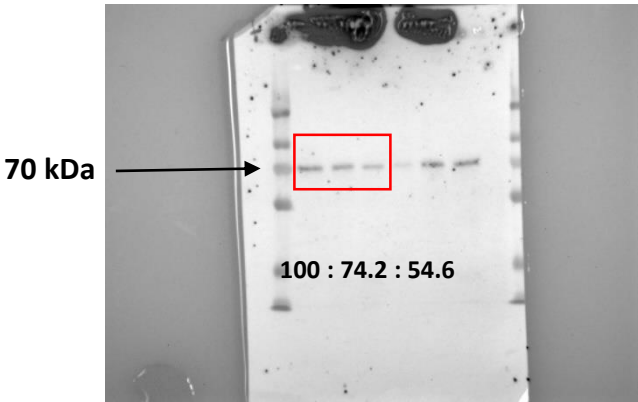

**IB:  $\alpha$ -tubulin**

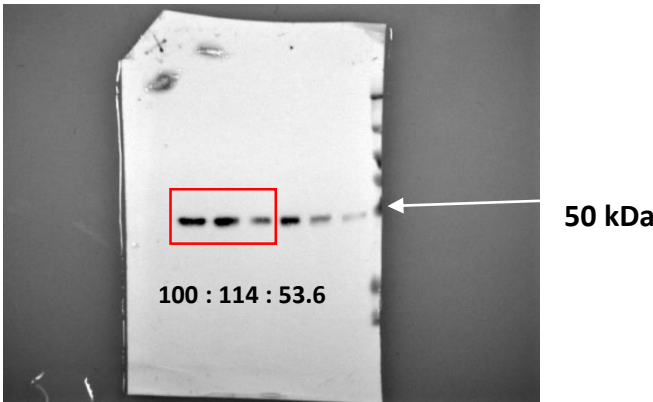

Lane order left to right of samples shown in figure (red box):

- 1. DMSO
- 2. 5  $\mu$ M SW2\_152F
- 3. 50  $\mu$ M SW2\_152F

**MDA-MB-468**

**IB: CBX2**

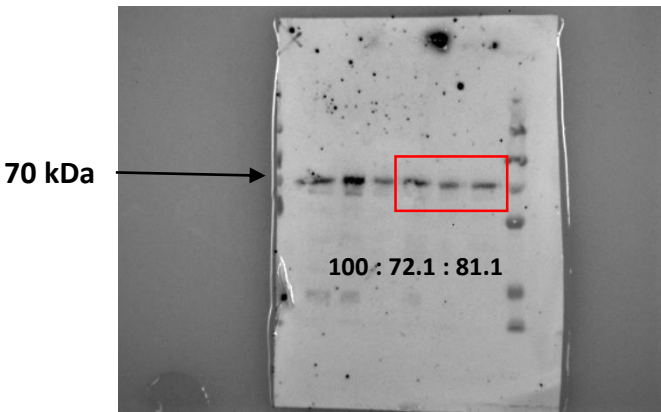

**IB:  $\alpha$ -tubulin**

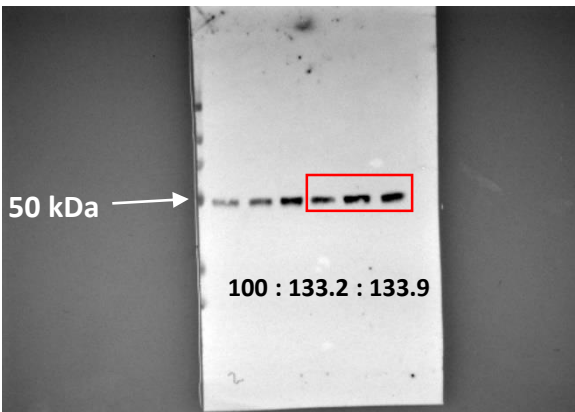

Lane order left to right of samples shown in figure (red box):

- 1. DMSO
- 2. 5  $\mu$ M SW2\_152F
- 3. 50  $\mu$ M SW2\_152F
